# Supplementary material
Source: PubMed Central journal article supplement (PMC7012187)
Supplement: kpsb-15-01-1703503-s002.pdf [file kpsb-15-01-1703503-s002.pdf]

## Supplementary file

### Validation of transcriptome experiments using qRT-PCR

#### Methods

1 µg of RNA (samples, used for RNA-SEQ) was used for cDNA synthesis using RevertAid reverse transcriptase (Thermo Scientific) according to manufacturer's instructions. Two µl of 5-fold-diluted cDNA were used as the template for qPCR. Real-time polymerase chain reaction (qPCR) was carried out on a CFX96 Touch RT-PCR Detection System (Bio-Rad, USA). The efficiency of the primers was calculated by performing RT-PCR on several dilutions of first-strand cDNAs. Efficiencies of the different primer sets were similar. A cDNA dilution of 2.5 µl (1/15) was used for amplification. The PCR mixture (10 µl) was constituted by 0.4 µM of each forward and reverse gene-specific primer, 0.2 mM dNTPs, 1× SYBR Green (Sigma, USA) and 0.1 µl of 5 U µl<sup>-1</sup> heat-stable Taq Polymerase (Evrogen, Russia). The thermal cycling conditions were 95°C for 3min, 40 cycles each at 95°C for 15 s and 60°C for 1 min. A 60-to-95°C melting curve was constructed to confirm specificity of the products. For each of the two biologically independent cDNA samples, two independent technical replications were performed and averaged for further calculations. Gene-specific primers for the analyzed genes were designed using the Universal ProbeLibrary Assay Design Centre (<http://lifescience.roche.com/>). Expression of *FesTIR1*, *FesARF19*, *FesEXPI*, *FesSAND* and *FesCACs* genes characterized in the table below was evaluated by qPCR. Three housekeeping genes were used [1]. The level of expression of each housekeeping gene was calculated as well (by normalization relatively to two remaining housekeeping genes). The relative standard curve method was used for calculation of expression ([https://www.gu.se/digitalAssets/1125/1125331\\_ABI\\_-\\_Guide\\_Relative\\_Quantification\\_using\\_realtme\\_PCR.pdf](https://www.gu.se/digitalAssets/1125/1125331_ABI_-_Guide_Relative_Quantification_using_realtme_PCR.pdf)). Relative expression levels were determined as the ratios between the quantities of cDNA corresponding to the target genes and values of housekeeping genes, then ratio between treated samples and control samples was calculated (Figure).

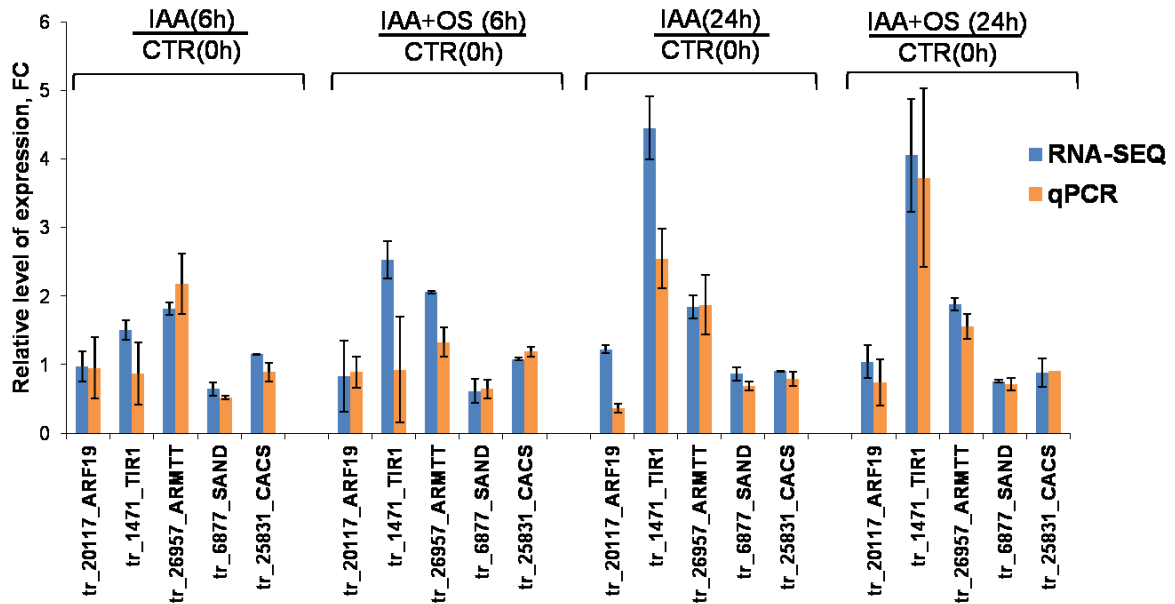

Figure. Comparison of gene expression values obtained by qRT-PCR and RNA-SEQ analyses.

Primer sequences

| name<br>(f - forward,<br>r- reverse) | tr                  | Primer sequences              | Arabidopsis ortholog                                                | Ref |
|--------------------------------------|---------------------|-------------------------------|---------------------------------------------------------------------|-----|
| FesTIR1_f                            | tr_1471             | GATGCTATCCGTGGCTTTTG          | AT3G62980, transport inhibitor response 1                           |     |
| FesTIR1_r                            | tr_11620 (paralogs) | CAGCCAGATAGCACATGACAG         |                                                                     |     |
| FesARF19_f                           | tr_20117            | GAGATGCATTGACGTGAACC          | AT1G19220, auxin response factor 19                                 |     |
| FesARF19_r                           |                     | CCTTCAATCCCAAACATACGA         |                                                                     |     |
| FesARMTT_f (Exp1_f [1])              | tr_26957            | AGGCCAGTTCCTGCTGAATGTAATGC    | AT4G33380, dimethylallyl, adenosine tRNA methylthiotransferase      | [1] |
| FesARMTT_r (Exp1_r [1])              |                     | TAGCCTGATCCAAACAAGCCTGGCAA    |                                                                     |     |
| FesCACS_f                            | tr_25831            | AAGACAGTCAGTTTCGTGCCACCTGA    | AT5G46630, clathrin adaptor complexes medium subunit family protein | [1] |
| FesCACS_r                            |                     | TCCATGCGTGTCTACCCAACCTCCTT    |                                                                     |     |
| FesSAND_f                            | tr_6877             | GACCCCTTGACAGACAAAGCATTGGCA   | AT2G28390, SAND family protein                                      | [1] |
| FesSAND_r                            |                     | TCTCGTTCTCAACGTCTTTTACCCACTGG |                                                                     |     |

CDS sequences <http://fagopyrum.org/> (yellow – forward primer, blue – reverse primer)

tr\_1471

ATGCCCTTTTATGCGGTTCCCTCTTCTCCTAAATCAGATAAGTGTGCTTCTCATTCCAAATCCAACGGTTATCATTACTTCTCTCACTTCTTTCTTCTG  
GGCCGTCCGATCGATCAATTCATCTCATCTGAGGGCACACGCCCTAGGATGCTGATTCAGAGGTTCCCGGAGGTCAGATCTCTTGTAGTTGAAGGGGA  
AACCACACTTTGCCGACTCAATCTGATCCCTGAGGGTTGGGGTGGCTTTGTAGACCCTGGATCGACGCAATGGCGACGGCCTATCCTTGGCTAGAG  
GAGCTCCGGTTGAAAAGGATGGTGGTACTGATGATGGATTGGAGCTTATTGCAAAGTCGTTTAAAGAATTCAGGTTTATGTTGAGTTCTGTGCGA  
AGGGTTCAGTACTGATGGATTAGCTGCCATTGCTTCTTGCAGGAATCTTAGGGTACTAGATCTGCGCGAATGTGATGTTGAGGATCTTAATGGAC  
ATTGGCTAAGCCTTTTCTGAAAACCTGCACATCGTTGGTAAACCCTTAATATTGCTTGCTTGGGCTCGAGGTTAGCTTTCTGCATTGGAGCGCCTCG  
TGGGTAGGTGTCCAAATCTGAAGAGTCTGCGTCTCAACCGTGTGTGCCTCTTGATAGACTTTCTGACTTCTTCTCGCCGGGCTCCTCAGCTGACTGAGT  
TTGGTACAGGCCTTATTCTGTAAACCTCCGGTCCGAAGTCTTCTCCAACCTTATCTGGAGCATTCTCAGGGTGCAAGCACCTGAAGAGCTTTCAGGA  
CTTTGGGATGTAGTGCCTGCTTATCTTCTGCCATTTATCTGTCTGTTCAGGGCTGACTACTTTGAATCTGAGTTATGCTGCCATCCAGGGACAGAT  
CTTATTAAGCTCATTACCGATGCCCAAATTTACAGTGCCTCTGGGTTATGGATTACATTGAAGATACCGGCTAAGCTTTGCTGTCATCATGCAA  
GGACCTGAAAGAATAAGAGTATTTCTTCTGATCCATTTGTTGTGAACCGAATGTAATCTTGACTGAGCAAGGCTTGTCTTCTGCTCTGAAGGGT  
GCCCAAGCTTAGTTCAGTATTACTTTTCCGCCAGATGACAAACAATGCCTTGGTTACAATTGCAAGGAATTGTCAAAATTTGATTCTGTTCCGCT  
TGTGCATCATTGACCCACACACCCAGACTATTTAACACTGCAGCCTCTTACGATGGCTTTGGTGCCATTTGTAACATTGCAAAGAGCTCAGGCGG  
CTTTCCCTTCTGCTCCTCACTGATTGTGATTCAAAATACATAGGGAGGTATGCCAAAAGTTGGA **GATGCTATCCGTGGCTTTTG**CTGGAGATGGT  
GATGCGGGTCT **CTGTCAATGCTATCTGGCTG**TGAAAAGCCTTCGAAAACCTAGAGATTAGAGATAGCCCATTTGGTTCACAGAGCTCTACTAGCCAATGC  
TGCAAAGCTGGAGACAATGCGATCCCTTTGGATGTCTCTCTGTTCACTGAGTTATGAAGCATGCAAATTAAGCTTACTAGCCAAAGAATGCCAAGCTTAATG  
TTGAGATCATTGATGAGAGGGAATCCCAAAGCAAGATCAGAAAACGCCCTTCGTGGAGAAAACCTGTATATTACAGGACCGTCGCCGACCAAGGTT  
TGACATGCCCCGACTTTGTTTACAATGCAGACAATGGTTCAACCGAAAAGGCTTTCTGA

tr\_11620

ATGCCCTTTTATGCGGTTCCCTCTTCTCCTAAATCAGATAAGTGTGCTTCTCATTCCAAATCCAACGGTTATCATTACTTCTACTACCTTCTTCTTCTG  
GACCGTCCGATCGATCAAAATTCATCTCATCTGAGGGCACACGCCCTAGGATGCTGATTCAGAGGTTCCCGGAGGTCAGATCTCTTGTAGTTGAAGGGGA  
AACCACACTTTGCTGACTCAATCTGATCCCTGAGGGTTGGGGTGGCTATGTAGACCCTGGATCGACGCAATGGCGACGGCCTATCCTTGGCTAGAG  
GAGCTCCGGTTGAAAAGGATGGTGGTACTGATGATGGATTGGAGCTTATTGCAAAGTCGTTTAAAGAATTCAGGTTTATGTTGAGTTCTGTGCGA  
AGGGTTCAGTACTGATGGATTAGCTGCCATTGCTTCTTGCAGGAATCTTAGGGTACTAGATCTGCGCGAATGTGATGTTGAGGATCTTAATGGAC  
ATTGGCTAAGCCTTTTCTGAAAACCTGCACATCGTTGGTAAACCCTTAATATTGCTTGCTTGGGCTCGAGGTTAGCTTCTGCAATTGGAGCGCCTCG  
TGGGTAGGTGTCCAAATCTGAAGAGTCTGCGTCTCAACCGTGTGTGCCTCTTGATAGACTTTCTACTTCTTCTCGCCGGGCTCCTCAGCTGACTGAGT  
TTGGTACAGGCCTTATTCTGTAAACCTCCGGTCCGAAGTCTTCTCCAACCTTATCTGGAGCATTCTCAGGGTGCAAGCACCTGAAGAGCCTTTCAGGA  
CTTTGGGATGTAGTGCCTGCTTATCTTCTGCCATTTATCTGTCTGTTCAGGGCTGACTACTTTGAATCTGAGTTATGCTGCCATCCAGGGATCAGAT  
CTTATTAAGCTCATTACCGATGCCCAAATTTACAGTGCCTCTGGGTTATGGATTACATTGAAGATACCGGCTAAGCTTTGCTGTCATCATGCAA  
GGACCTGAAAGAATAAGAGTATTTCTTCTGATCCATTTGTTGTGAACCGAATGTAATCTTGACTGAGCAAGGCTTGTCTTCTGCTCTGAAGGGT  
CCCAAGCTTAGTTCAGTATTACTTTTCCGCCAGATGACAAACAATGCCTTGGTTACAATTGCAAGGAATTGTCAAAATTTGATTCTGTTCCGCT  
GTGATCATTGAGCCACACACCCAGACTATTTAACACTGCAGCCCTTGACGATGGTTTGGTGCCATTGTTGAAAATTTGATAGAGCTCAGGGCTC  
TTTCCCTTCCGGCTCCTCACTGATTGTGATTCAAAATACATAGGGAGGTATGCCAAAAGTTGGA **GATGCTATCCGTGGCTTTTG**CTGGAGATGGT  
GATGCGGGTCT **CTGTCAATGCTATCTGGCTG**TGAAAAGCCTTCGAAAACCTAGAGATTAGAGATAGCCCATTTGGTTCACAGAGCTCTACTAGCCAATGC  
TGCAAAGCTGGAGACAATGCGATCCCTTTGGATGTCTCTCTGTTCACTGAGTTATGAAGCATGCAAATTAAGCTTACTAGCCAAAGAATGCCAAGCTTAATG  
TTGAGATCATTGATGAGAGGGAATCCCAAAGCAAGATCAGAAAACGCCCTTCGTGGAGAAAACCTGTATATTACAGGACCGTCGCCGACCAAGGTT  
TGACATGCCCCGACTTTGTTTACAATGCAGACAATGGTTCAACCGAAAAGGCTTTCTGA

tr\_20117

ATGAAGGTTCCGTCGAATGGATACACTCCGAATTCGGAGAAGAAGGAAGGCTTTAATTCGGAGTTATGGCATGCCTGTGCCGACCCTGGTTTC  
TGTGCCCTCTATGGAAAGTCTGGTTGTCTATTTTCTCAAGGCCACAGTGAACAGGTTGCAGCATCAATGCAAAAGGATACTGACAGCATCCCAAGCT  
ATCCAAACCTACCATTCTAAGTTGGTTTGGCTCAATGTCACATTACAGTGTGATACAGAAACCGATGAAGTATATGCCAGCTGACTCTTCAA  
CCAGTTAATAAGTTGGACAAGGAAGCTTTGCTAGCATCTGAGATTGGCCCAAAACAAAACAGGCAGCCTGCCGAGTTCTTCTGCAAAACTCTAAGT  
CTAGTGACACAAGCCCATGGTGGATTTCTGTACCACGACGGCTGCAGAAAAGATCTTCCACCTTAGATTTTATGATGCAACCTCTGCCCAA  
GAGCTGACTGCTAAAGATCTTACGGGCAATCATGGACATCTCCGACACATATACCGGGTCAACCAAAAAGGCAGTTGTGACCACAGGTTGGAGTA  
TTTTGTAGTCTCAAAAAGATTGTTGCTGGGGACTCCGTTCTTTATTAGAGACGAGAAATCACAACCTTCTCTGGGCATCAAACTGCTAATAGGC  
AGCAACCTGCCCTTGTCTTTCAGTCAATCCAGTGACAGCATGCACATTGGAATTTGGTGCAGCAGCTCATGTCAGCTAATCACAGCCGTTT  
ACTATTTTCTACAATCAAGGGTAGTCCAGCTGAATTTGTTATTTCCCTAGCCAAGTATAACAAAGCTATGTACACCAAGTTTCTTGGGGATGCG  
ATTTAGAATGATGTTTGAACAGAGGATTCTGGGGTGCAGAGATATATGGGTAATCACAGCTGTCAGTGATCTTGATGCAAGGTTGAAAAAC  
TCCCAGTGGCGTAGCCTGCAGGTTGGTGGGATGAATCAACAGCTGGTGCAGCTCCGGTCTCAATCTGGGATATCGAGCCTGTCTTACTCC  
TTTTACATATGCCACCTCTTTTTTCAGACAAAAGTTTCCAAGACAGCCAGGATTTCAGACAATGAATCTGATATGGAGAGCCTATTCAAGAGAG  
GCATGCCCTGGCTGGAGATGACTTTGGCAGGAAGGATGCTACAGCCAGCTCAATGATTCCTGGCTTGTAGTCTAGCTCAGTGGATGAGCATGCAACA  
GAATAATCAGTTTTCAGGGGCTCAGCCTGGGCTTTTGTATCCATGATATCAGCTTCTTCTATAACAGTAACCTAGGTGTTGATGACCCCTCAAGTT  
GTTGAGCTTCAAGCACCATCTTGAATATGCCTAATCTCCCGTTAAACAAGGTCACCAACAAGGCAGGTTCAAAAACGGGCTCTGTGGG GAGA  
TGCATTGACGTGAACCCTATAGGGGTTATGATGAGCTACGACATGACCTAGCTCGTATGTTGGGATTGAAGGACAACTGGAAGATCCCAAGAA  
CAGAATGGAACCTGCTATGTAGATCATGAAAACGACATACTCTCGTGGGTGATGATCCATGGGAGGAGTTTGAACCTGTGTCCAAAGCATAAA  
GATATTTTCTACTGAAAGTGACAAATGAGCTGGATGGCTACTTAGGCAGCGTTCCTCCGTTACAGAACAACTTACAGTGGAGCTGACAGCGGA  
AATGCTTGGAGAGGTCAGTATGATGACAATTCAGTGCCTCTTTAACTGA

tr\_26957

ATGGCGAGACTTGAGTTGGGAGAACGAAATGGTGTCTGACAAAGAAACAACACTCGTTATTTGCTCGATCAATATCGTTATCGCTCTCTACGTTCT  
TCGCTCCATCTATAGCTCTGTATCTCTACCCTGGTCAACCCTGCTCATAGTTATAAGTACACCCTAGATCAGTTGAAGAAAATGGACGAATCAA  
TGAGAATTCGAAAGCATCAGAACCCTACAGTTGGTCAAAGTGGTTAGAGAAATGGAGCAGGAATTTGCTGCCAAGAAAGTGGAACAAAATTAT  
CAAAGCATGTTAAGCAGATGATCAGAGATGAAATTTTCAGAAACTAAGAAGCTTGCTGCCACTGCCAATGTGACTCTACAAAGAGAAGCAATTGA  
AAGTTGGAGAAGAAAACCTGCAAGAAGCAAAAATCATGCCTCTGGGGAGAAAATAACCCTAAAGTTATAACAGAGGATGAAGCTGGGATATT  
ATTGCAAGTGGAGTGAAGTGGCAAAATCTTATGGAAGATGACCTATCATCAAAGTTCAGATAATACCAACTGAATTTTGAATGAGGAGCATGATGATAATC  
GGAGGTTGTTGATGAATCTGAGGAGGAAGATCCATTACCGGGC AGGCCAGTCTCTGCTGAATGTAATGCCGAACCTCATAACAGATTATGGTGGGGCA  
GCAGTAAGGTGGGGTCAACCCATCACAAGGAAAGTGACAGCAGATTG TGGCAGGCTGTG TGGATCAGGCTA AACTCGCCAAGCCTGGTGAATGA  
GATGTAACATATGGGTTTATTGCCCTGTGAGACTGGTTGCTTTTACCAGATATTTATGAACACAAAAACCAGGAGTGTGGTTAAAATACGATGAA  
AAGCGAAATTGAACCTCAAGGACAACCTACTCAGATGCATATAGGATCAGTATCCAACAGCCCCGGTGGTTGTTCCATGGGTTTCCGGGGTGGTTA  
AGGCATGA

tr\_25831

ATGGTTGATGCCTTCCGGATGCATATTTATGCAAAACAAAGGAGCTTGGCACATGCCCTGTGAGACAGATAGGAGGTTGTACGTTCTTATACATGAGGA  
TTAGCAATGTGTACATTTGTTCTGTTGTAGCAGCAACGCTAATGTTGCCCTGTGCTTCAAATTTGTGGTTGAGGCTGCAATCTTTTCAAGTCTTACT  
TGGCGGACAATTTGATGAAGATGCGATCCGCAATAATTTGCTCTCATTTATGAACCTTTGGATGAAATCATGGATTTGGTTACCCCAAGAACTTTTC  
TCCGTAGATATTTGAAGTTTACATACCCAGGAAGGAGTACGGTCAACATCTCATCAAAGTTCAGAGATAAGCCAGTCCCAAAATGCAACCTTGC  
GTTACAGGAGCTGTTGGCTGGAGGAGAGAGGGTCTTGTCTATAAAAAGAACGAGGTTTCTTAGACATCGTGGAAAGTGTTAATCTTTCATGTCTTC  
AAAGGTAGCGTTCGCGTTGTGATGTTACTGGGAAGGTTCTTATGAAGTGTCTCTCTGGAATGCCTGATTTAAAGTTGGGATTTAAATGATAAGA  
TTGGTCTCGAAAAGAGTCTCAGATAAAGGCCCTCTGTGAAAAGTGGGAAAACAATTGAGCTTGTATGTAACCTTCCATCAGTGTGTGAATTT  
GACGAGATCTCAACTCTGAA AAGACAGTCAAGTTTGTGCCACTGTA AGTGAATGTCAAGGTCAAGAGTGTTTTTGGTGCAAAAGATGTTTGCAGTGG  
TTCTGTGTTGCAACAATCA AAGGAGTTGGGTAGAACACGCGATGGA AGTGAATGTCAAGGTCAAGAGTGTTTTTGGTGCAAAAGATGTTTGCAGTGG  
AGTTGTTATAAAGATTCCAGTCCCAAAGCAAAGTGCAAAAACAAGTTTCAAGTGCATCCGGAAAAGCCAAATACAATCCATCCATTGATTGTTG  
GTGTGGAAGATTAGAAAATCCCTGGTGCAGACTGAGCCAACTCTGAGTGCAGAAGTTGAGTTGATTTCTACCATGGGAGAAAAGAAGTCAATGGACTA  
AACCACCAATCAGTACGTTTTCAGGTTCTATGTTACAGCATCAGTGTCCGATTCTTAAAGTGTGGGAGAGGAGTGGATACAACAC  
AGTAGAGTGGGTTCTGTACATAACCAAGGCTGGCTCTACAGATCAGGTGCTAG

tr\_6877

ATGGTATCCGATTCGAGCTGCTTCTCTCATCTGGAGCCGAGGATTCGTCGATCAAAACCCTAGCCCAACCTCGAGCCCGCATTGGCCGACCCGGA  
GGACGAGATGGCCGACGAGGTAAGTCTGACGAGGCTCCCCCGCCGGCCGATGATTCGGCGACGATACGAACGACAACGAACTAGTGGAGGA  
AGTTGAGGTAGGCGATATCGCCGGAAATGAGGCTGGGGACGCGGAGGATGATGCTCGGAAATGTGGTGAGATATCGGTCGACTCGGAAGAGGT  
GGCGTGGTGGTGGAGGATTGACAGAGGCGAAAGGAGAGTGTATTCGTTTCGATTCGGTGGAGATTGGAGGGAGTGAATTCGGAGCCTTTGGACC  
CGAGGAAGCGCGCTAGCCCTAGCAGTAGCGGGTATGCTGGTGAGAGAGGACTAGTGTGATGGGAGTGTCTTGGAAATTGAGGAGATTGGGGA  
AGACGAAATCCGCGAGGTGAGGGAAGATGAATTGACCAACGGGATCAGTACTGCGGATCAGCCTGGGTTCCGGGGAAGAAACACGTCGATGAGGA  
TGATGCATCTTTCATGGAGGAAGAGGAAAAAACTATTTCATCTGAGCCACTCTGGGAAGCCTATTTATCCAGATAAGGAGATGAGCAGAGG  
CTTGTCTGATTTCTGCAACTCTGCAAGCCATAATTTCTTCGATGTGTTCTGTAAAAGGGCCCTATTACTGGTCTGCATAAGCTGTACAGAGGAG  
CCTTATGAGTCAATTAAGGGGACAGTTGGAGCTTTTATATGGTCAGATGATACTGATTTTGACAAAAGTCAAGTAAATAGATGCTTTGAGAAGAACCCTAA  
GTTTGATATGACACCTTTGCTGGTGGGACTGATGTTGATTTCTTCACTCATCCATTCTTCGGTGGAAACCCGGCTACTTTTCTACATGCATATACA  
TGCTACCCTGCTTACTACTAGCAAGCAGCAGGCGCTGATTGCAAGATGTTGCTGATTTCTGGTGTCTTTTGGCAATTTTGTAGATGAAAGAC  
AAGTTGTGACGCTAGTTGGTGCACAAAAGCTTCACTTCCAGATGATGCTGTACTTCCAATTTTGTATGTCATCAGACTCTTTCAGGACA  
TCAGATTTTCTCGCGATTGCTTGGCAAGATATAATCAATGGCTTTCTATATGCTATGTTCTAATTTAGATGACAAAAGGAGTCCGTTCTGATGTTG  
CTTACTACTAGTTCAGATGCTTTTTACCATCTGAAAGAATCCAGGGTGCATTTGAATCTGTTCTTTTGAAGTCTAACGTTCTTAGTGAAGTCCAAAGG  
TCAATGCTGGATGGTGGTATGATGTTGAAGATTGCTGAGATGATCCCTCAATCTGCACCGGTTCTCTCATATAGGCCAGCCTCTCCAGAG  
AGTTTCAGGCATTTCTCCGGACCCGGTGGCCAGCTGGGCTGTGGCACTCATGATACCCTAGTATTTATTTGGATCAGTATGTGCTTCTGAAATTC  
TCAGCTCAATCAGTACTCTCAACAGCAGAAAGATTGATAGACAATACAGAAAGCTTTATGCTTCTATGATGACAAAAGGAGTCCGTTCTCACA  
AAACTCAGTTCAGAAGAGATGAAAATATGTTCTACTCTGCTGGGTGACACCGGACTTTGAGCTTTATGCTGCTTTT GACCCCTTGCAGACAAAAGCA  
TTGGCAATCAAGACATGCAACCCGCTATG CAGTGGGTAAGACGTTGAGAACGAGA TTTCTTGTGGAGCTAGCCCTTTTTCATGTTAA

1. Demidenko, N.V., Logacheva, M.D., Penin, A.A. (2011) Selection and Validation of Reference Genes for Quantitative Real-Time PCR in Buckwheat (*Fagopyrum esculentum*) Based on Transcriptome Sequence Data. PLoS ONE 6(5): e19434. <https://doi.org/10.1371/journal.pone.0019434>
